# Supplementary material for: HBK-15 bypasses BDNF via ERK1/2-biased 5-HT1A receptor signaling to deliver a rapid antidepressant-like effect
Source: Research Square preprint supplement (doi:10.21203/rs.3.rs-7315313/v1), 2025-08-28
Supplement: Supplementary file 1 [file 494b7a1e27e976f213b480c1.docx]

**HBK-15 bypasses BDNF via ERK1/2-biased 5-HT1A signaling to deliver a rapid antidepressant-like effect**

Kinga Sałaciak1, Angelika Jagielska1,2, Klaudia Lustyk1,Monika Głuch-Lutwin3,Barbara Mordyl3, Elżbieta Żmudzka4, Anna Janus1,2, Aleksandra Koszałka1,2, Jan Detka5,Alicja Skórkowska6,7, Weronika Krzyżanowska6,7, Bartosz Pomierny6,7, Jorge Valero Gómez-Lobo8,9,10, Bila Abdoul Fatahou Kabore11, Séverine Morisset-Lopez11, Karolina Pytka1*

1Laboratory of Experimental Neuropharmacology, Department of Pharmacodynamics, Faculty of Pharmacy, Jagiellonian University Medical College, 9 Medyczna St, 30-688 Krakow, Poland

2Doctoral School of Medical and Health Sciences, Jagiellonian University Medical College, 16 Św. Łazarza St, 31-530 Krakow, Poland

3Department of Pharmacobiology, Jagiellonian University Medical College, 9 Medyczna St, 30-688 Krakow, Poland

4Department of Social Pharmacy, Faculty of Pharmacy, Jagiellonian University Medical College, 9 Medyczna St, Krakow, Poland

5Department of Pharmacodynamics, Faculty of Pharmacy, Jagiellonian University Medical College, 9 Medyczna St, 30-688 Krakow, Poland

6Department of Toxicological Biochemistry, Faculty of Pharmacy, Jagiellonian University Medical College, 9 Medyczna St, Krakow, Poland

7Imaging Laboratory, Center for the Development of Therapies for Civilization and Age-Related Diseases, Jagiellonian University Medical College, Poland

8Department of Cell Biology and Pathology, Universidad de Salamanca. Facultad de Medicina. Avd. Campus Miguel de Unamuno. 37007 Salamanca, Spain

9Laboratory of Neuronal Plasticity and Neurorrepair. Institute for Neuroscience of Castilla y León, Univesidad de Salamanca. C/ Pintor Fernando Gallego, 1, 37007, Salamanca, Spain

10TGYC-03-Laboratory of Neuronal Plasticity and Neurorrepair, Institute of Biomedical Research of Salamanca. Edificio Virgen de la Vega, 10.ª planta
Pº de San Vicente, 58-182. 37007 Salamanca, Spain

11Centre de Biophysique Moléculaire, CNRS UPR 4301, Université d’Orléans, rue Charles Sadron, 45071 Orléans Cedex 2, France

***Corresponding Author:**

Karolina Pytka

Laboratory of Experimental Neuropharmacology, Department of Pharmacodynamics, Faculty of Pharmacy, Jagiellonian University Medical College, 9 Medyczna St, 30-688 Krakow, Poland

Phone number: +48 (12) 620-55-38, e-mail: [karolina.pytka@uj.edu.pl](mailto:karolina.pytka@uj.edu.pl)

**Table S1. Cellular functional activity of HBK-15 at the 5-HT2B receptor.**

|  | **Agonist mode** | | | **Antagonist mode** | | | |
| --- | --- | --- | --- | --- | --- | --- | --- |
|  | **Emax** | **EC50**  **[nM]** | **pEC50** | **Imax** | **IC50**  **[nM]** | **pIC50** | **pKb** |
| **serotonin** | 100% | 4.9 | 8.31 | - | - | - | - |
| **HBK-15** | 2% | n.c. | n.c. | 82% | 180 | 6.74 | 7.55 |
| **SB 206553** | - | - | - | 21% | 18 | 7.74 | 8.56 |

Functional studies on the 5-HT2B receptor were performed commercially at Eurofins Laboratories (Poitiers, France). In agonist mode, responses were normalized to the maximal effect of the reference agonist (serotonin at 10-6 M), with Emax defined as the maximum achievable stimulation. Effects below 25% are not considered significant. Responses from 25% to 70% are interpreted as a partial agonist. A response higher than 70% is characterized as a full agonist. The concentration–response curve for HBK-15 showed less than 25% efficacy at the highest concentration, indicating a lack of agonist activity. In antagonist mode, responses were normalized to the maximal response obtained without the antagonist. HBK-15 exhibited weak antagonist activity. The Iₘₐₓ, defined as the maximum observed inhibition, EC50 and IC50 values (expressed as pEC50 or pIC50, the negative logarithm of the concentration producing 50% of the maximal effect/inhibition) are presented as mean from three separate experiments. Kb values represent the equilibrium dissociation constant of a competitive antagonist, calculated using the Cheng–Prusoff equation. n.c.- not calculable.

**Figure S1. Microinjection cannula positions. a**: Arrow indicates the placement of the cannula. **b**:Coronal section of brain showing the cannula placement (scale bar – 1 mm).

**
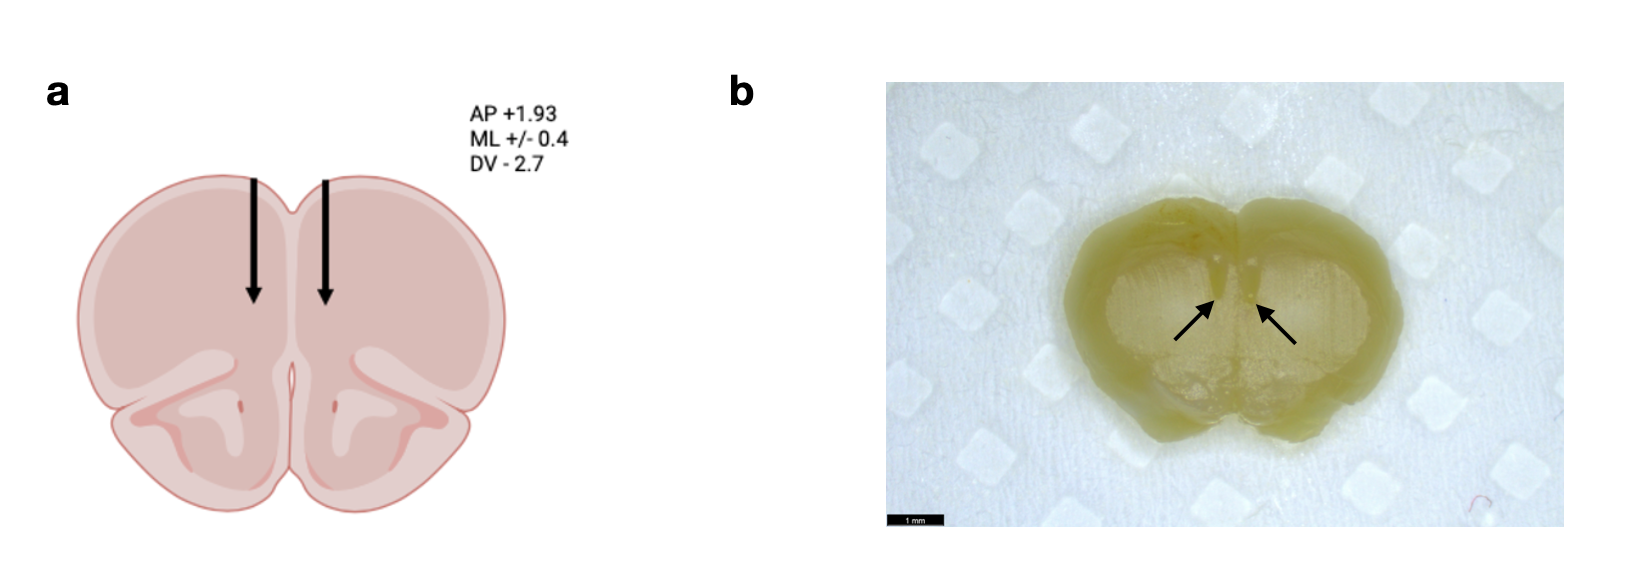
**

**Figure S2. (complementary to Figure 2) Immunofluorescent detection of pERK1/2 and pPKA in non-stressed, stressed, HBK-15- and ketamine-treated neurons**

**a-b**: Representative confocal images (maximum intensity projection Z-stacks spanning 5 μm in depth) showing in cyan phosphorylated ERK1/2 (pERK1/2; **a**) and phosphorylated PKA (pPKA; **b**) immunostainings in the prelimbic cortex of mice subjected to the unpredictable chronic mild stress (UCMS) and treated with HBK-15 or ketamine, along with stressed and non-stressed controls. DAPI was used for nuclear staining (gray), and MAP2 (microtubule-associated protein 2) for neuron identification (magenta). Scale bar = 50 μm.

**Figure S3. (complementary to Figure 2) HBK-15 does not alter the expression of plasticity-related genes in the prefrontal cortex of chronically stressed mice.**

**a–f**: HBK-15 and ketamine did not significantly alter the mRNA expression of *Mapk1* (F3,24=4.581, p=0.0113; **a**), *Mapk3* (H4,28=2.375, p=0.4983; **b**), *Riiad1* (F3,24=1.567, p=0.2233; **c**), *Camk4* (F3,24=1.605, p=0.2143; **d**), *Creb* (F3,24=0.3206, p=0.8104; **e**), or *Bdnf* (H4,27=5.977, p=0.1127; **f**) in the prefrontal cortex of chronically stressed mice, as measured by qPCR.

Data are presented as mean ± SD (**a,c,d,e**) or median with interquartile range (**b,f**). Statistical analysis: one-way ANOVA (Bonferroni *post hoc*; **a,c,d,e**) and Kruskal–Wallis (Dunn’s *post hoc*; **b,f**); *p < 0.05, n = 6–7. Doses are expressed in milligrams per kilogram of body weight (mg/kg).

**Figure S4 (complementary to Figure 3) HBK-15 moderately modulates PKC protein without altering CaMKII and RSK2 gene expression**

**a–b**: Relative mRNA expression of *Rps6ka3* (F3,24=1.107, p=0.3657; **a**) and *Camk2a* (H4,28=1.37, p=0.7125; **b**), measured by qPCR, showed no significant changes following HBK-15 or ketamine treatment in mice subjected to the unpredictable chronic mild stress.

**c–d**: HBK-15 increased phosphorylated PKC (F5,29=3.154, p=0.0215; **c**) but not PKC (F5,24=2.809, p=0.0391; **d**) protein levels in the prefrontal cortex compared to stressed control mice.

The data are presented as means ± SD (**a,c,d**) or medians with interquartile range (**b**). Statistical analysis: one-way ANOVA (Bonferroni *post hoc*; **a,c,d**) and Kruskal-Wallis (Dunn’s *post hoc;* **b**); *p<0.05, n=5-7. Doses are expressed in milligrams per kilogram of body weight (mg/kg).
